# hypeR: An R Package for Geneset Enrichment Workflows

Anthony Federico<sup>1,2\*</sup>, Stefano Monti<sup>1,2\*</sup>

<sup>1</sup>Bioinformatics Program, Boston University, Boston, MA 02118, USA.

<sup>2</sup>Section of Computational Biomedicine, Boston University School of Medicine, Boston, MA 02118, USA.

## ABSTRACT

**Summary:** Geneset enrichment is a popular method for annotating high-throughput sequencing data. Existing tools fall short in providing the flexibility to tackle the varied challenges researchers face in such analyses, particularly when analyzing many signatures across multiple experiments. We present a comprehensive R package for geneset enrichment workflows that offers multiple enrichment, visualization, and sharing methods in addition to novel features such as hierarchical geneset analysis and built-in markdown reporting. hypeR is a one-stop solution to performing geneset enrichment for a wide audience and range of use cases.

**Availability and implementation:** The most recent version of the package is available at <https://github.com/montilab/hypeR>.

**Contact:** [anfed@bu.edu](mailto:anfed@bu.edu) or [smonti@bu.edu](mailto:smonti@bu.edu)

**Supplementary information:** Comprehensive documentation and tutorials, are available at <https://montilab.github.io/hypeR-docs>.

## 1 INTRODUCTION

Geneset enrichment is an important step in biological data analysis workflows, particularly in bioinformatics and computational biology. At a basic level, one is performing a hypergeometric or Kolmogorov-Smirnov test to determine if a group of genes is over-represented or enriched, respectively, in pre-defined sets of genes, which suggests some biological relevance. The R package hypeR brings a fresh take to geneset enrichment, focusing on the analysis, visualization, and reporting of enriched genesets. While similar tools exist - such as Enrichr (Kuleshov et al., 2016), fgsea (Sergushichev, 2016), and clusterProfiler (Wang et al., 2012), among others - hypeR excels in the downstream analysis of geneset enrichment workflows - in addition to sometimes overlooked upstream analysis methods such as allowing for a flexible background population size or reducing genesets to a background distribution of genes. Finding relevant biological meaning from a large number of often obscurely labeled genesets may be challenging for researchers. hypeR overcomes this barrier by incorporating hierarchical ontologies - also referred to as relational genesets - into its workflows, allowing researchers to visualize and summarize their data at varying levels of biological resolution. All analysis methods are compatible with hypeR's markdown features, enabling concise and reproducible reports easily shareable with collaborators. Additionally, users can import custom genesets that are easily defined, extending the analysis of genes to other areas of interest such as proteins, microbes, metabolites, etc. The hypeR package goes beyond performing basic enrichment, by providing a suite of methods designed to make routine geneset enrichment seamless for scientists working in R.

## 2 IMPLEMENTATION

hypeR is a Bioconductor package written completely in R. The core function `hypeR()` accepts one or more signatures and a list of genesets to test for either over-representation or enrichment, depending on whether the signature is a vector of unranked genes, or a ranked vector of genes with or without weights. The former case is applicable to clusters of genes, such as those identified through co-expression analysis, while the latter is useful when signatures of genes can be ranked, such as through differential expression analysis. Despite its flexibility, `hypeR()` always returns one or more `hyp` objects that are defined using R6 (Mailund & Mailund, 2017), which is an implementation of encapsulated object-oriented programming for R. A `hyp` object contains all information relevant to the enrichment analysis, including a data frame of results, enrichment plots for each geneset tested, as well as the arguments used to perform the analysis. All downstream functions used for analysis, visualization, and reporting recognize `hyp` objects and utilize their data. Adopting an object oriented framework brings modularity to hypeR, enabling flexible workflows. Additionally, most of hypeR's functionalities are applicable after enrichment results have been calculated. Therefore, users can perform enrichment with other popular tools, and use hypeR to analyze the results, by formatting the output into a `hyp` object. As an example, the documentation includes a tutorial for transforming the output of `fgsea` into a `hyp` object and analyzing the data with hypeR.

## 3 APPLICATION

`hypeR()` requires two arguments, a signature of genes and a list of genesets. Depending on the type of signature and genesets provided, downstream functions will behave differently. The simplest use case involves a single signature. When running `hypeR()` on a single signature, one `hyp` object is returned. One can extract the data slot to manually inspect the results, or use `hyp`-compatible functions in their analysis.

### 3.1 Visualization Plots

To visualize `hyp` objects, users can call `hyp_show()` to view the data as an interactive table, `hyp_dots()` to plot top enriched genesets, and `hyp_emap()` to represent them as an enrichment map. `hyp_dots()` returns a horizontal dot plot whereby each dot represents a geneset, colored by its enrichment significance and scaled by its size. `hyp_emap()` returns an interactive enrichment network generated with `visNetwork`. An enrichment map is useful for identifying clusters of related genesets. Each node represents a geneset, colored by its enrichment significance, and each edge represents the Jaccard index or overlap similarity of two genesets.

\*To whom correspondence should be addressed.



analysis web server 2016 update. *Nucleic Acids Research*.

<https://doi.org/10.1093/nar/gkw377>

Liberzon, A., Subramanian, A., Pinchback, R., Thorvaldsdóttir, H., Tamayo, P., &

Mesirov, J. P. (2011). Molecular signatures database (MSigDB) 3.0.

*Bioinformatics*. <https://doi.org/10.1093/bioinformatics/btr260>

Mailund, T., & Mailund, T. (2017). R6 Classes. In *Advanced Object-Oriented*

*Programming in R*. [https://doi.org/10.1007/978-1-4842-2919-4\\_7](https://doi.org/10.1007/978-1-4842-2919-4_7)

Sergushichev, A. A. (2016). An algorithm for fast preranked gene set enrichment

analysis using cumulative statistic calculation. *BioRxiv*.

<https://doi.org/10.1101/060012>

Yu, G., Wang, L.-G., Han, Y., & He, Q.-Y. (2012). clusterProfiler: an R Package for

Comparing Biological Themes Among Gene Clusters. *OMICS: A Journal of*

*Integrative Biology*. <https://doi.org/10.1089/omi.2011.0118>
